# Supplementary material for: Transient Receptor Potential Ankyrin 1 (TRPA1) Is Involved in Upregulating Interleukin-6 Expression in Osteoarthritic Chondrocyte Models
Source: PubMed Central journal article supplement (PMC7794684; doi:10.3390/ijms22010087), 2020-12-23
Supplement: ijms-22-00087-s001.pdf [file ijms-22-00087-s001.pdf]

Supplementary Table S1.

Genes involved in the GO term 'Positive regulation of interleukin-6 production' (GO:0032755) with significantly altered expression in chondrocytes from TRPA1 KO mice compared to cells from corresponding WT mice

| <b>GO term</b>                                               | <b>Number of altered genes</b> | <b>Altered genes</b>                                                                              | <b>FDR-adjusted p-value</b> |
|--------------------------------------------------------------|--------------------------------|---------------------------------------------------------------------------------------------------|-----------------------------|
| Positive regulation of interleukin-6 production (GO:0032755) | 14                             | <i>IL33, SPON2, TICAM2, CARD9, IL1F9, P2RX7, PYCARD, IL1A, IL6, IL1F6, IL1B, CD36, CCR5, TLR2</i> | 0.0135                      |

Next-generation RNA sequencing was performed on IL-1 $\beta$ -treated chondrocytes from TRPA1 KO and corresponding WT mice. Gene Ontology (GO)-analysis focusing on the GO term 'Positive regulation of interleukin-6 production' (GO:0032755) was performed using the DAVID database. P-value is given as false discovery rate (FDR)-adjusted.

All genes involved in GO:0032755 term according to the Gene Ontology Browser of the Mouse Genome Informatics (MGI) database can be found at: <http://www.informatics.jax.org/go/term/GO:0032755> (accessed 13.11.2020)
